# Supplementary material for: An intercomparison of CH 3 O 2 measurements by Fluorescence Assay by Gas Expansion and Cavity Ring–Down Spectroscopy within HIRAC (Highly Instrumented Reactor for Atmospheric Chemistry)
Source: Copernicus journal article supplement (doi:10.5194/amt-2019-405), 2019-11-14
Supplement: Supplementary file 1 [file amt-2019-405-supplement.pdf]

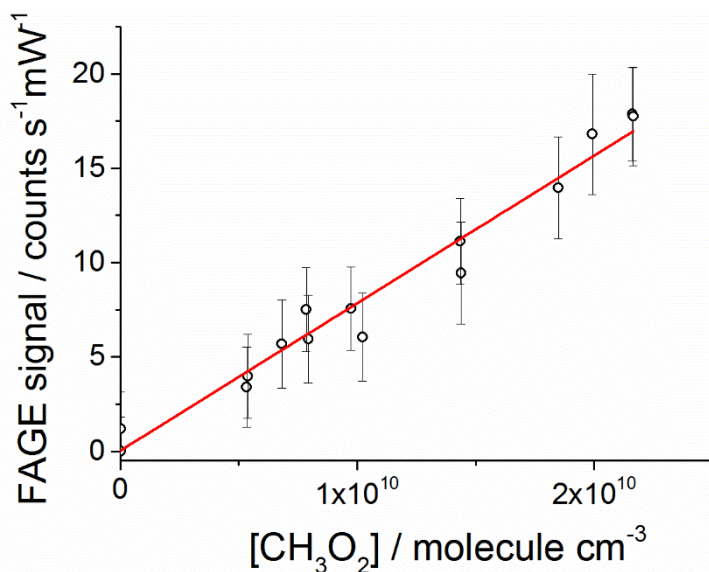

**Figure S1.** An example of a calibration using the indirect FAGE technique for  $\text{CH}_3\text{O}_2$  detection using 184.9 nm photolysis of water vapour at 295 K and atmospheric pressure to generate OH radicals.  $\text{CH}_3\text{O}_2$  radicals were generated using the reaction OH with  $\text{CH}_4$  in the presence of  $\text{O}_2$ , in the range of  $\sim (0.5\text{--}2.0) \times 10^{10}$  molecule  $\text{cm}^{-3}$  by varying the power supplied to the photolysis lamp;  $[\text{CH}_4] = 5.0 \times 10^{16}$  molecule  $\text{cm}^{-3}$  and  $[\text{NO}] = 6.7 \times 10^{13}$  molecule  $\text{cm}^{-3}$ . A line of best fit through these data yields a sensitivity factor  $C_{\text{CH}_3\text{O}_2} = (7.8 \pm 0.4) \times 10^{-10}$  counts  $\text{cm}^3$  molecules $^{-1}$  s $^{-1}$  mW $^{-1}$ , where the error limits are the standard error of the fit to the data. The error limits in the FAGE signal are statistical errors at the  $1\sigma$  level.

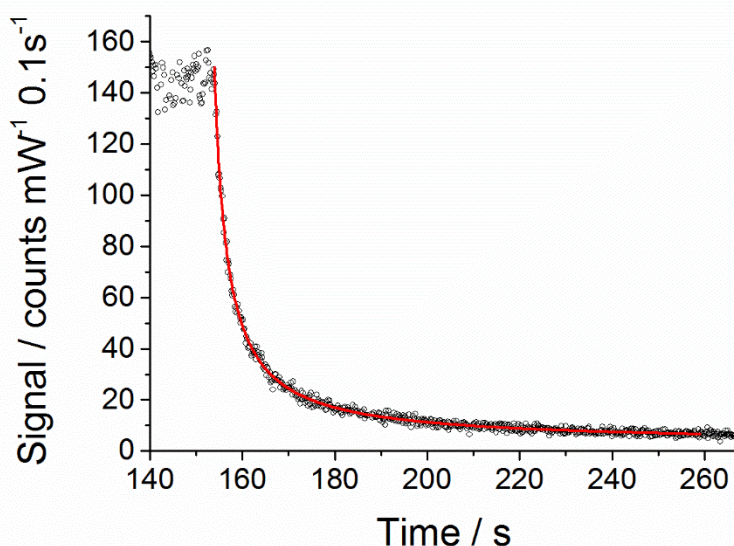

**Figure S2.**  $\text{CH}_3\text{O}_2$  decay via its self-reaction measured by FAGE for the 80 mbar He: $\text{O}_2$  (3:1) atmosphere within HIRAC. Radicals were generated by photolysis of molecular chlorine in the presence of methane, with  $[\text{Cl}_2] = 3.2 \times 10^{14}$  molecule  $\text{cm}^{-3}$  and  $[\text{CH}_4] = 2.5 \times 10^{17}$  molecule  $\text{cm}^{-3}$ . The photolysis lamps were turned off at  $\sim 150$  s. Fitting Eq. (5) in the main text to the data yields the sensitivity factor  $C_{\text{CH}_3\text{O}_2} = (3.89 \pm 0.05) \times 10^{-9}$  counts  $\text{cm}^3$  molecules $^{-1}$  s $^{-1}$  mW $^{-1}$ . The error limits are statistical errors at the  $1\sigma$  level.

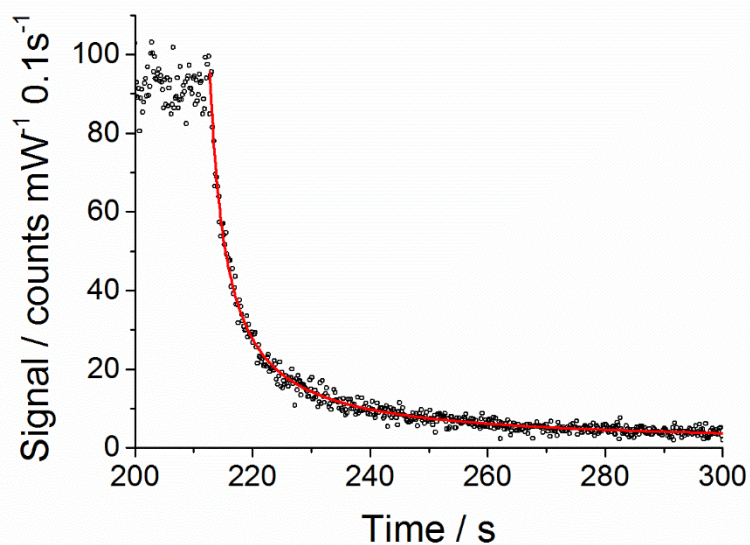

**Figure S3.**  $\text{CH}_3\text{O}_2$  decay via its self-reaction measured by FAGE for the 100 mbar synthetic air atmosphere within HIRAC. Radicals were generated by photolysis of molecular chlorine in the presence of methane, with  $[\text{Cl}_2] = 3.3 \times 10^{14} \text{ molecule cm}^{-3}$  and  $[\text{CH}_4] = 2.5 \times 10^{17} \text{ molecule cm}^{-3}$ . The photolysis lamps were turned off at  $\sim 210 \text{ s}$ . Fitting Eq. (5) in the main text to the data yields the sensitivity factor  $C_{\text{CH}_3\text{O}_2} = (2.65 \pm 0.04) \times 10^{-9} \text{ counts cm}^3 \text{ molecules}^{-1} \text{ s}^{-1} \text{ mW}^{-1}$ . The error limits are statistical errors at the  $1\sigma$  level.

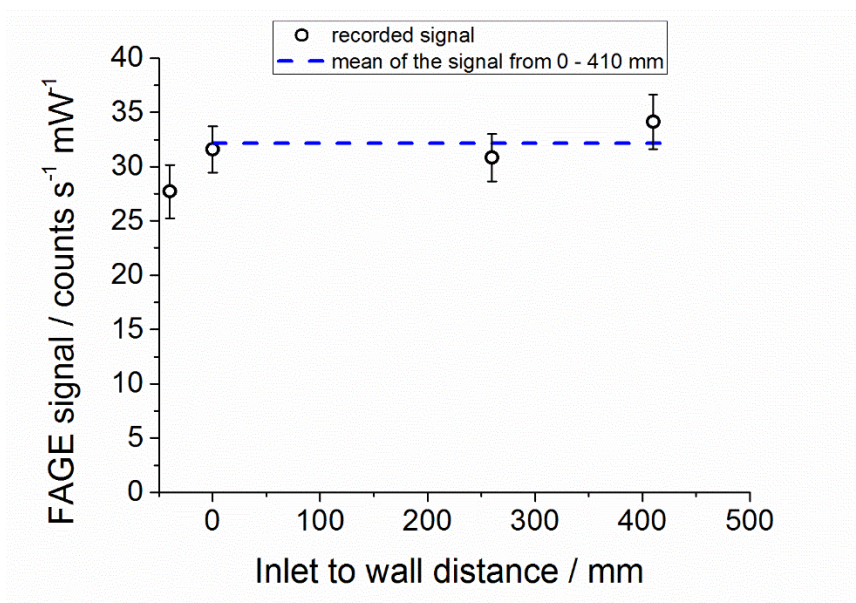

**Figure S4.** Measurement of the  $\text{CH}_3\text{O}_2$  radical signal plotted against the distance the FAGE inlet protrudes from the HIRAC chamber. Each point (black circles) shows the steady-state  $\text{CH}_3\text{O}_2$  signal averaged over 5 min for a certain position of the instrument inlet across the chamber radius. The blue line represents the mean of the signal recorded from 0 mm (inlet flush with the wall) to 410 mm inlet to internal wall distance.  $\text{CH}_3\text{O}_2$  was generated by photolysing ozone ( $\sim 2.5 \times 10^{13}$  molecule  $\text{cm}^{-3}$ ) in the presence of methane ( $2.5 \times 10^{17}$  molecule  $\text{cm}^{-3}$ ) at 254 nm. The FAGE instrument couples to the chamber through a flange mounted on the outside, allowing the inlet to be positioned behind the chamber walls similar to the CRDS mirrors. Here (40 mm behind the wall, so  $-40$  mm), a 14% signal drop was observed compared to the mean of values from 0 – 410 mm.

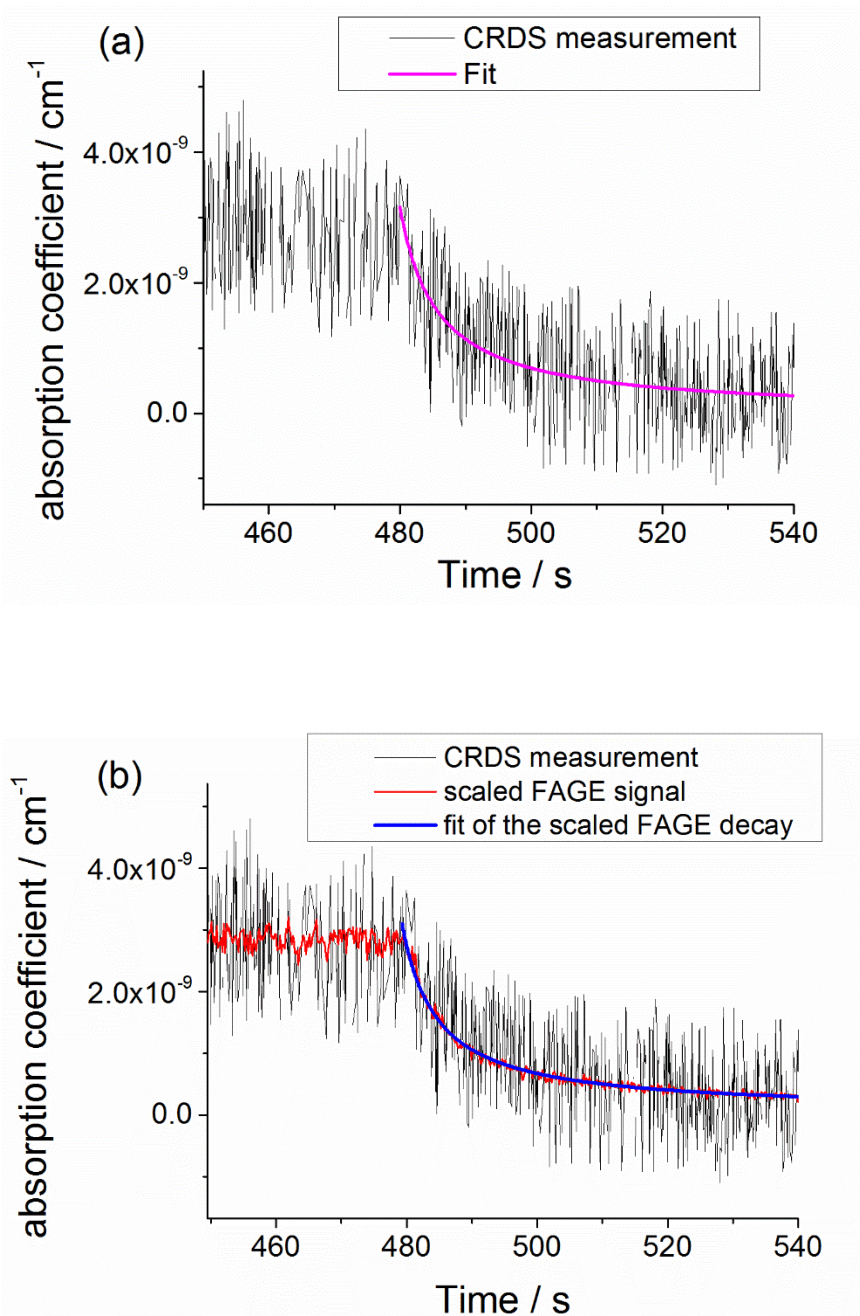

**Figure S5.** Second-order decay of the  $\text{CH}_3\text{O}_2$  absorption coefficient at  $7488 \text{ cm}^{-1}$  from CRDS data (single ring-down events – black line in both panels (a) and (b)) along with the FAGE signal monitored simultaneously but scaled vertically to overlap the CRDS data (red line; panel (b)). The traces were recorded at 295 K and with a 80 mbar mixture of  $\text{He}:\text{O}_2 = 3:1$ ;  $[\text{Cl}_2]_0 = 1.1 \times 10^{14} \text{ molecule cm}^{-3}$  and  $[\text{CH}_4]_0 = 2.5 \times 10^{16} \text{ molecule cm}^{-3}$ . The fit of Eq. (8) in the main text to the CRDS data (magenta line in panel (a)) resulted in  $\sigma_{\text{HO}_2} = (1.71 \pm 0.15) \times 10^{-20} \text{ cm}^2 \text{ molecule}^{-1}$  while the fit of the same equation to the scaled FAGE data (blue line; panel (b)) gave  $\sigma_{\text{HO}_2} = (1.55 \pm 0.02) \times 10^{-20} \text{ cm}^2 \text{ molecule}^{-1}$ . The error limits are statistical errors at the  $1\sigma$  level.

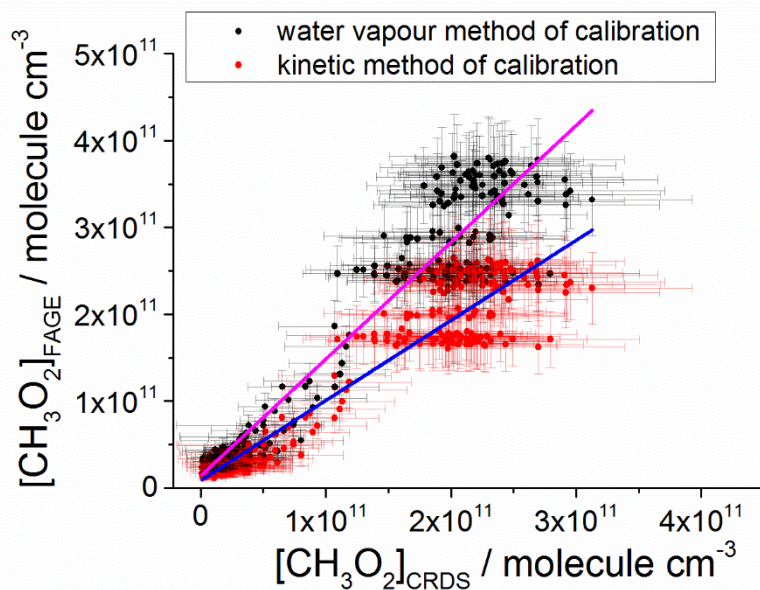

**Figure S6.** Correlation plots of the data generated by using FAGE and CRDS at 1000 mbar of air.  $[\text{CH}_3\text{O}_2]$  measured by FAGE is plotted against  $[\text{CH}_3\text{O}_2]$  measured by CRDS.  $[\text{CH}_3\text{O}_2]_{\text{CRDS}}$  was calculated using a cross section of  $1.49 \times 10^{-20} \text{ cm}^2 \text{ molecule}^{-1}$ . FAGE was calibrated by two methods described in the main text: the 184.9 nm photolysis of water vapour in the presence of  $\text{CH}_4/\text{O}_2$  (black circles,  $C_{\text{CH}_3\text{O}_2} = (8.03 \pm 1.37) \times 10^{-10} \text{ counts cm}^3 \text{ molecules}^{-1} \text{ s}^{-1} \text{ mW}^{-1}$ ) and using the second order kinetics of the  $\text{CH}_3\text{O}_2$  temporal decay (red circles,  $C_{\text{CH}_3\text{O}_2} = (1.16 \pm 0.15) \times 10^{-9} \text{ counts cm}^3 \text{ molecule}^{-1} \text{ s}^{-1} \text{ mW}^{-1}$ ). The separate linear fits to the data obtained using the two FAGE calibration methods result in a gradient of  $1.35 \pm 0.07$  and an intercept of  $(1.4 \pm 0.3) \times 10^{10} \text{ molecule cm}^{-3}$  for the data using the water vapour calibration and a gradient of  $0.92 \pm 0.05$  and an intercept of  $(8.8 \pm 2.3) \times 10^9 \text{ molecule cm}^{-3}$  for the data using the kinetic method of calibration. The linear fits were generated using the orthogonal distance regression algorithm; fit errors at  $2\sigma$  level. Each point is an averaged value over 5 s.
